# Supplementary material
Source: PubMed Central journal article supplement (PMC2772661)
Supplement: NIHMS145517-supplement-01.pdf [file NIHMS145517-supplement-01.pdf]

## Supplemental Data

### The *Drosophila* Hindgut Lacks

### Constitutively Active Adult Stem Cells

### but Proliferates in Response to Tissue Damage

Donald T. Fox and Allan C. Spradling

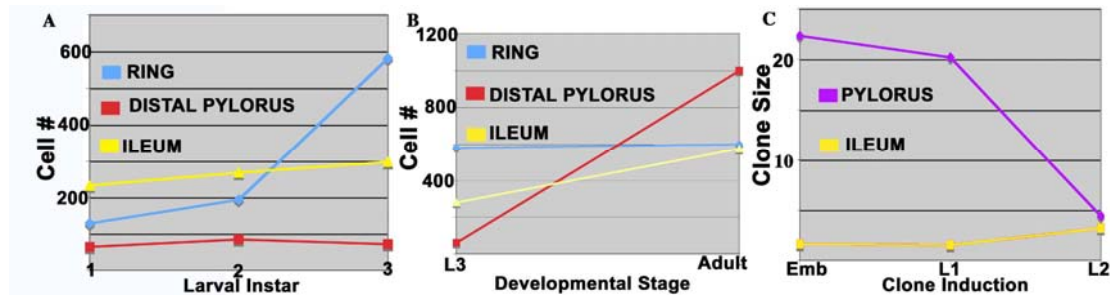

**Figure S1. Cell content and proliferation of the hindgut**

Graph showing the number of cells in the larval ring (blue), the distal pylorus (red) and the ileum (yellow) during the three larval instars. **B)** Graph showing the number of cells in the larval ring (blue), the distal pylorus (red) and the ileum (yellow) before (L3) and after (adult) pupal development. **C)** Graph showing the average size in third instar larvae of cell clones marked at late embryo, 1<sup>st</sup> or 2<sup>nd</sup> instar.

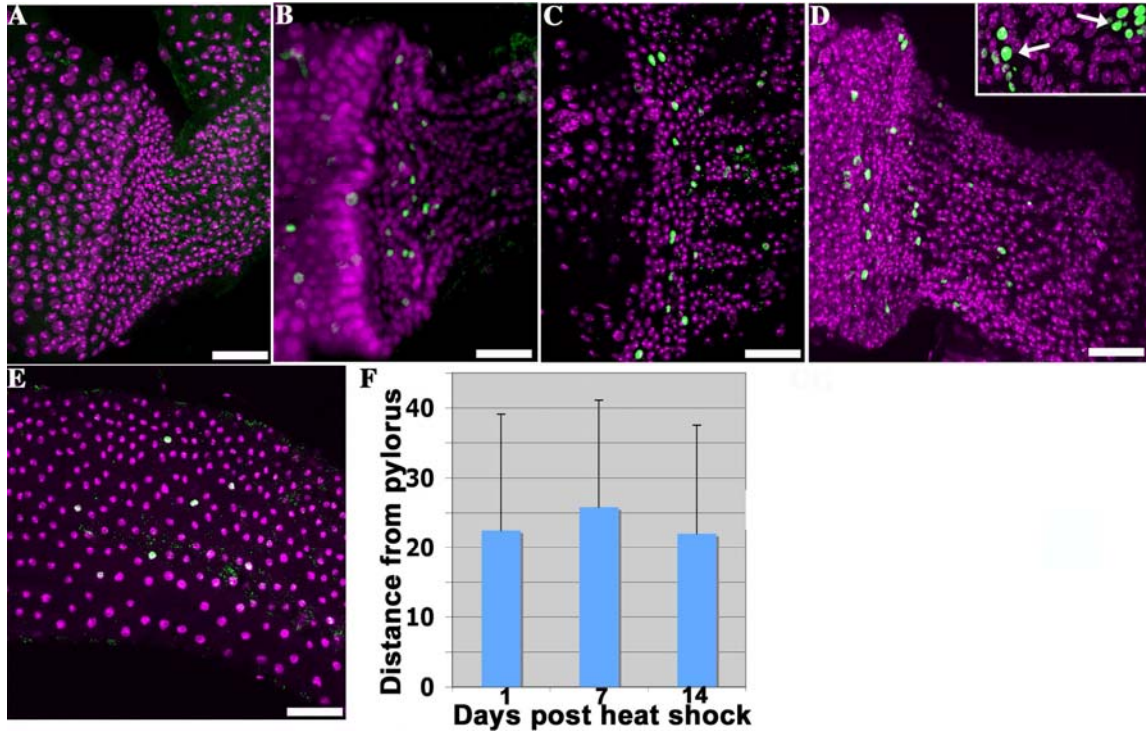

**Figure S2. Clones induced in adult hindguts via the lacZ system do not increase in size**

**A)** Control showing absence of clones in non-heat-shocked animals. **B-D)** Representative images of hindguts at various times following the induction of adult lacZ clones by heat shock. **B)** Day 1 post-heat-shock. **C)** Day 8 post-heat-shock. **D)** Day 15 post-heat-shock. No increase in hindgut clone size is seen, but midgut clones in the same animals have grown to encompass many more cells (inset, arrows). **E)** Representative image of day 8 ileal clones showing no increase in cell number. **F)** Graph showing the average distance of the adult ileal clones from the pylorus at various times after clone induction.

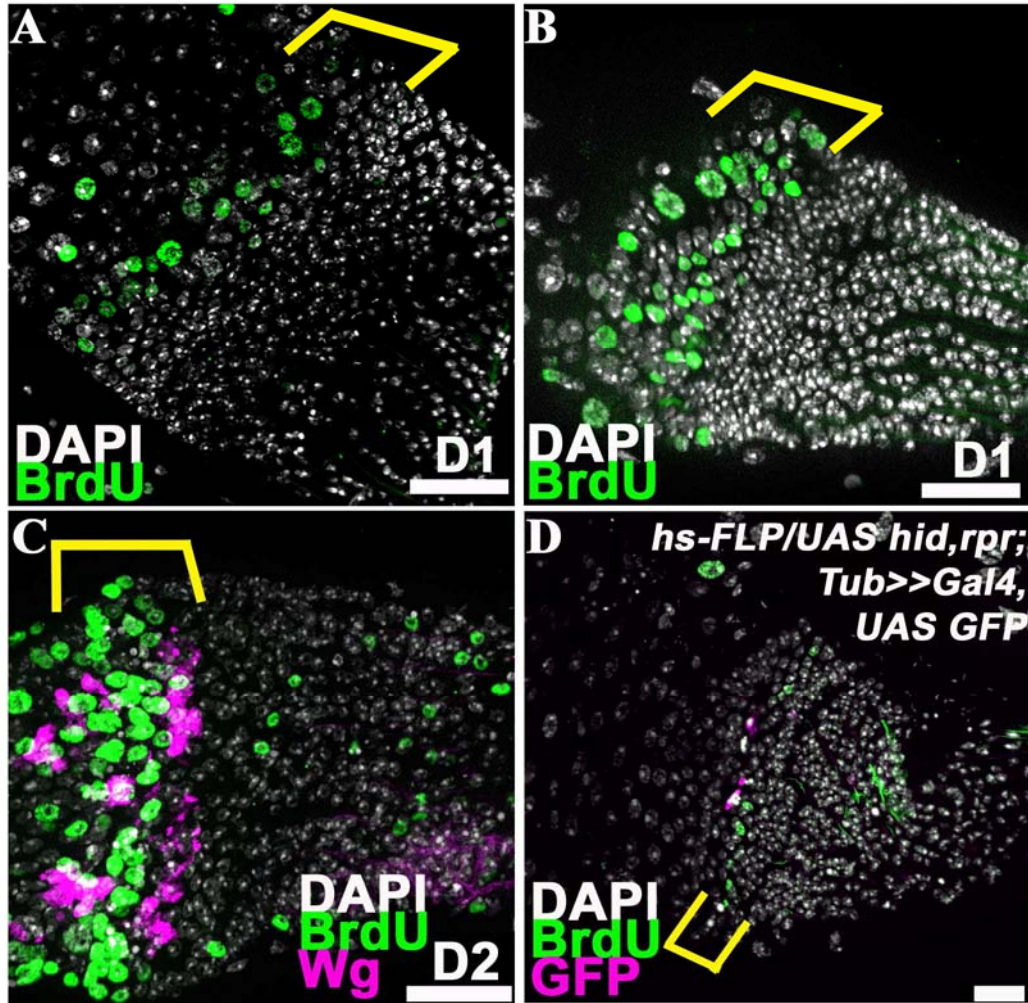

**Figure S3. Adult pyloric cells responds to damage**

**A)** BrdU incorporation (green) is confined to the Wg ring of the adult pylorus during the first 24 hours after initiating UAS-*DTI* expression by shifting the temperature to 30 °C. **B)** BrdU incorporation is confined to the Wg ring of the adult pylorus during the first 24 hours after initiating UAS-*Ricin* expression by shifting the temperature to 30 °C. **C)** BrdU incorporation in the adult pylorus during the second day after temperature shift occurs both in the Wg ring and more posteriorly. **D)** BrdU incorporation during the first 24 hours after inducing FLP-out clones marked with GFP (pink) and expressing *hid* and *rpr*. BrdU incorporation (green) is observed in unrecombined cells adjacent to GFP-expressing cells (see inset **I**). All images- anterior to the left. DAPI (white), BrdU (green). Scale bar=25µm.

**Table S1.** Frequency of pyloric clones

| Induction time                 | Clonal system | Large Clones <sup>1</sup><br>(>20 cells) | Medium Clones <sup>1</sup><br>(3-19 cells) | Small Clones <sup>1</sup><br>(1-2 cells) | Guts analyzed <sup>2</sup> | Clones analyzed <sup>2</sup> |
|--------------------------------|---------------|------------------------------------------|--------------------------------------------|------------------------------------------|----------------------------|------------------------------|
| Embryo                         | lacZ          | 0.24                                     | 0.36                                       | 0                                        | 25                         | 15                           |
|                                | MARCM         | 0.97                                     | 1.4                                        | 0.76                                     | 33                         | 107                          |
| Pupal Day1                     | lacZ          | 0                                        | 4.0                                        | .54                                      | 38                         | 171                          |
| Adult Day 4                    | lacZ          | 0                                        | 0                                          | 40                                       | 30                         | 1207                         |
|                                | MARCM         | 0.014                                    | .20                                        | .15                                      | 69                         | 25                           |
| Adult control (no $\Delta T$ ) | lacZ          | 0                                        | 0                                          | 0                                        | 52                         | 0                            |
|                                | MARCM         | .011                                     | .36                                        | .16                                      | 69                         | 37                           |

<sup>1</sup>Clone frequency = number of clones of the indicated size / the number of guts analyzed.

<sup>2</sup>Embryonic, larval and pupal clones were analyzed in 4-7 day-old-adults. Adult clones were analyzed 14-21 days after induction.
